# Supplementary material
Source: PubMed Central journal article supplement (PMC10524300)
Supplement: NIHMS1885949-supplement-supinfo.pdf [file NIHMS1885949-supplement-supinfo.pdf]

**SUPPLEMENTARY MATERIAL**

*Table S1a: Medications considered to be PIMs for this analysis based on modified AGS Beers Criteria®*

| <b>Medication</b>                                                                                 | <b>ATC</b> | <b>Medication</b>                             | <b>ATC</b> | <b>Medication</b>                                       | <b>ATC</b> | <b>Medication</b>                         | <b>ATC</b> |
|---------------------------------------------------------------------------------------------------|------------|-----------------------------------------------|------------|---------------------------------------------------------|------------|-------------------------------------------|------------|
| <b>Androgens or Estrogens</b>                                                                     |            | <b>Benzodiazepines continued</b>              |            | <b>Drugs with anti-cholinergic properties continued</b> |            | <b>NSAID without use of PPI continued</b> |            |
| Methyltestosterone                                                                                | G03BA02    | Oxazepam                                      | N05BA04    | Imipramine                                              | N06AA02    | Naproxen                                  | M01AE02    |
| Testosterone                                                                                      | G03BA03    | Clorazepate                                   | N05BA05    | Clomipramine                                            | N06AA04    | Ketoprofen                                | M01AE03    |
| Estradiol                                                                                         | G03CA03    | Lorazepam                                     | N05BA06    | Trimipramine                                            | N06AA06    | Fenoprofen                                | M01AE04    |
| Estriol                                                                                           | G03CA04    | Alprazolam                                    | N05BA12    | Amitriptyline                                           | N06AA09    | Oxaprozin                                 | M01AE12    |
| Estrone                                                                                           | G03CA07    | Meprobamate                                   | N05BC01    | Nortriptyline                                           | N06AA10    | Meclofenamate                             | M01AG04    |
| Conjugated estrogens                                                                              | G03CA57    | Flurazepam                                    | N05CD01    | Protriptyline                                           | N06AA11    | Mefenamic acid                            | M01AG04    |
| Tibolone                                                                                          | G03CX01    | Estazolam                                     | N05CD04    | Doxepin >6 mg/day                                       | N06AA12    | Nabumetone                                | M01AX01    |
| <b>Antipsychotics</b>                                                                             |            | Triazolam                                     | N05CD05    | Amoxapine                                               | N06AA17    | Naproxen                                  | M02AA12    |
| Chlorpromazine                                                                                    | N05AA01    | Temazepam                                     | N05CD07    | Paroxetine                                              | N06AB05    | Diflunisal                                | N02BA11    |
| Perphenazine                                                                                      | N05AB03    | Quazepam                                      | N05CD10    | Diphenhydramine (oral)                                  | R06AA02    | <b>Other pain medications</b>             |            |
| Prochlorperazine                                                                                  | N05AB04    | Zolpidem                                      | N05CF02    | Clemastine                                              | R06AA04    | Indomethacin                              | M01AB01    |
| Trifluoperazine                                                                                   | N05AB06    | Zaleplon                                      | N05CF03    | Carbinoxamine                                           | R06AA08    | Ketorolac, includes parenteral            | M01AB15    |
| Periciazine                                                                                       | N05AC01    | Eszopiclone                                   | N05CF04    | Doxylamine                                              | R06AA09    | Meperidine                                | N02AB02    |
| Ziprasidone                                                                                       | N05AE04    | <b>Cardiovascular</b>                         |            | Dimenhydrinate                                          | R06AA52    | <b>PPIs without use of NSAID</b>          |            |
| Olanzapine                                                                                        | N05AH03    | Amiodarone                                    | C01BD01    | Brompheniramine                                         | R06AB01    | Omeprazole                                | A02BC01    |
| Quetiapine                                                                                        | N05AH04    | Dronedarone                                   | C01BD07    | Chlorpheniramine                                        | R06AB02    | Pantoprazole                              | A02BC02    |
| Amisulpride                                                                                       | N05AL05    | Isoxsuprine                                   | C04AA01    | Dexchlorpheniramine                                     | R06AB02    | Lansoprazole                              | A02BC03    |
| Lithium                                                                                           | N05AN01    | Nifedipine, immediate release                 | C08CA05    | Dexbrompheniramine                                      | R06AB06    | Rabeprazole                               | A02BC04    |
| Risperidone                                                                                       | N05AX08    | <b>Other endocrine</b>                        |            | Pyrilamine                                              | R06AC01    | Esomeprazole                              | A02BC05    |
| Aripiprazole                                                                                      | N05AX12    | Megestrol                                     | G03AC05    | Promethazine                                            | R06AD02    | Dexlansoprazole                           | A02BC06    |
| <b>Antithrombotics</b>                                                                            |            | Growth hormone                                | H01AC01    | Meclizine                                               | R06AE05    | <b>Skeletal muscle relaxants</b>          |            |
| Dipyridamole, oral short acting (does not apply to the extended-release combination with aspirin) | B01AC07    | Megestrol                                     | L02AB01    | Cyproheptadine                                          | R06AX02    | Carisoprodol                              | M03BA02    |
| <b>Barbiturates</b>                                                                               |            | <b>Drugs with anti-cholinergic properties</b> |            | Tripolidine                                             | R06AX07    | Methocarbamol                             | M03BA03    |
| Methylbarbital                                                                                    | N03AA01    | Homatropine (excludes ophthalmic)             | A03AA07    | <b>Gastrointestinal</b>                                 |            | Chlorzoxazone                             | M03BB03    |
| Phenobarbital                                                                                     | N03AA02    | Propantheline                                 | A03AB05    | Metoclopramide                                          | A03FA01    | Orphenadrine                              | M03BC01    |
| Pentobarbital                                                                                     | N05CA01    | Atropine (excludes ophthalmic)                | A03BA01    | Mineral oil, given orally                               | A06AA01    | Cyclobenzaprine                           | M03BX08    |
| Amobarbital                                                                                       | N05CA02    | Hyoscyamine                                   | A03BA03    | Desmopressin                                            | H01BA02    | <b>Sulfonyleureas, long acting</b>        |            |
| Secobarbital                                                                                      | N05CA06    | Belladonna alkaloids                          | A03BB01    | <b>NSAID without use of PPI</b>                         |            | Glyburide                                 | A10BB01    |
| <b>Benzodiazepines</b>                                                                            |            | Methylscopolamine                             | A03BB03    | Sulindac                                                | M01AB02    | Chlorpropamide                            | A10BB02    |
| Clonazepam                                                                                        | N03AE01    | Clidinium-chlordiazepoxide                    | A03CA02    | Tolmetin                                                | M01AB03    | Glimepiride                               | A10BB12    |
| Diazepam                                                                                          | N05BA01    | Scopolamine                                   | A04AD01    | Diclofenac                                              | M01AB05    |                                           |            |
| Chlordiazepoxide (alone or in combination with amitriptyline or clidinium)                        | N05BA02    | Trihexyphenidyl                               | N04AA01    | Etodolac                                                | M01AB08    |                                           |            |
|                                                                                                   |            | Benzotropine (oral)                           | N04AC01    | Piroxicam                                               | M01AC01    |                                           |            |
|                                                                                                   |            | Hydroxyzine                                   | N05BB01    | Meloxicam                                               | M01AC06    |                                           |            |
|                                                                                                   |            | Desipramine                                   | N06AA01    | Ibuprofen                                               | M01AE01    |                                           |            |

Table S1b: Medications not included as PIMs based on modified 2019 AGS Beers Criteria®

| Medication                                                                  | ATC     | Reason not prescribed                |
|-----------------------------------------------------------------------------|---------|--------------------------------------|
| Nitrofurantoin                                                              | J01XE01 | Insufficient prescribing information |
| Digoxin for first-line treatment of atrial fibrillation or of heart failure | C01AA05 | Insufficient prescribing information |
| Disopyramide                                                                | C01BA03 | Insufficient prescribing information |
| Reserpine (>0.1 mg/day)                                                     | C02AA02 |                                      |
| Methyldopa                                                                  | C02AB   |                                      |
| Clonidine for first-line treatment of hypertension                          | C02AC01 |                                      |
| Guanfacine                                                                  | C02AC02 |                                      |
| Prazosin                                                                    | C02CA01 | Insufficient prescribing information |
| Doxazosin                                                                   | C02CA04 |                                      |
| Terazosin                                                                   | G04CA03 |                                      |
| Insulin sliding scale                                                       | A10A    | Insufficient prescribing information |

Table S2: Baseline PIMs prevalence by medication class, based on modified 2019 AGS Beers Criteria®

| PIMs medication class<br>(descending order of prevalence) | N<br>(% of participants with at least one PIM) |
|-----------------------------------------------------------|------------------------------------------------|
| PPIs                                                      | 4054 (54.8%)                                   |
| NSAIDs                                                    | 1281 (17.3%)                                   |
| Benzodiazepines                                           | 1260 (17.0%)                                   |
| Androgens & estrogens                                     | 874 (11.8%)                                    |
| Drugs with anticholinergic properties                     | 857 (11.6%)                                    |
| Antipsychotics                                            | 277 (3.8%)                                     |
| Cardiovascular medications                                | 180 (2.4%)                                     |
| Other pain medication                                     | 110 (1.5%)                                     |
| Sulfonylureas                                             | 109 (1.5%)                                     |
| Gastrointestinal                                          | 43 (0.6%)                                      |
| Skeletal muscle relaxants                                 | 34 (0.5%)                                      |
| Barbituates                                               | 4 (<0.1%)                                      |
| Other endocrine                                           | 3 (<0.1%)                                      |

Table S3: Risk of disability and hospitalization outcomes by baseline PIMs exposure, based on modified 2019 AGS Beers Criteria® in participants who experienced both events

|                                              | No PIM<br>(n=11,718) |                                           | PIM<br>(n=7,396) |                                           | Unadjusted<br>hazard ratio<br>(95% CI) | Adjusted<br>hazard ratio<br>(95% CI) <sup>a</sup> |
|----------------------------------------------|----------------------|-------------------------------------------|------------------|-------------------------------------------|----------------------------------------|---------------------------------------------------|
|                                              | N                    | Rate per 1000<br>person years<br>(95% CI) | N                | Rate per 1000<br>person years<br>(95% CI) |                                        |                                                   |
| First event                                  |                      |                                           |                  |                                           |                                        |                                                   |
| Hospitalization<br>AND disability            | 131                  | 2.52 (2.12, 3.00)                         | 159              | 5.00 (4.26, 5.81)                         | 1.96 (1.60, 2.50)                      | 1.65 (1.30, 2.10)                                 |
| Hospitalization<br>followed by<br>disability | 94                   | 1.81 (1.48, 2.21)                         | 104              | 3.25 (2.68, 3.95)                         | 1.78 (1.35, 2.35)                      | 1.54 (1.15, 2.05)                                 |
| Disability followed<br>by hospitalization    | 37                   | 0.71 (1.52, 0.98)                         | 55               | 1.72 (1.32, 2.24)                         | 2.40 (1.58, 3.64)                      | 1.92 (1.25, 2.96)                                 |

<sup>a</sup> Adjusted for sex, age, country, years of education (<12y, vs 12y+), frailty, average gait speed, hypertension, diabetes, and the presence of depression.

Table S4: Assessment of interaction between Cox models for PIMs and Polypharmacy

|                                  | HR <sup>a</sup> : PIM          | HR <sup>a</sup> : Polypharmacy | HR <sup>a</sup> : Interaction | p for Interaction |
|----------------------------------|--------------------------------|--------------------------------|-------------------------------|-------------------|
| Loss of disability-free survival | 0.96 (0.87, 1.06)              | 1.33 (1.20, 1.48)              | 1.07 (0.89, 1.33)             | 0.43              |
| Death                            | 0.85 (0.72, 1.01)              | 1.32 (1.09, 1.60)              | 1.02 (0.78, 1.34)             | 0.87              |
| Incident disability              | 1.38 (1.05, 1.81)              | 1.76 (1.28, 2.41)              | 0.86 (0.57, 1.30)             | 0.47              |
| Dementia                         | 0.85 (0.68, 1.07)              | 0.93 (0.69, 1.23)              | 1.28 (0.87, 1.88)             | 0.21              |
| Incident Hospitalisation         | 1.23 (1.16, 1.30) <sup>b</sup> | 1.48 (1.36, 1.60) <sup>c</sup> | 0.86 (0.77, 0.94)             | 0.003             |

<sup>a</sup> Cox model included: PIM, Polypharmacy (baseline), PIMxPolypharmacy interaction, sex, age, country, years of education, frailty, average gait speed, hypertension, diabetes, and the presence of depression.

<sup>b</sup> For people with PIM and not polypharmacy, the expected rate of Hospitalization is 23% higher than amongst people without PIM, all other variables held constant. For people with PIM and Polypharmacy, the expected rate of hospitalization is  $1.23 \times 0.86 = 5.3\%$  higher than amongst people without PIM (95%CI 0.96, 1.14), all other variables held constant.

<sup>c</sup> For those with Polypharmacy and not PIM, the estimated hospitalization rate is 48% higher, compared to those without polypharmacy (95%CI: 1.36, 1.60). For those with Polypharmacy and PIM, the estimated hospitalization rate is  $1.48 \times 0.86 = 26.6\%$  higher, compared to those without polypharmacy (95%CI for HR: 1.17, 1.36).

Table S5 – Risk of primary endpoint, death, dementia, disability and hospitalisation outcomes by baseline PIMs medication category exposure based on modified 2019 AGS Beers Criteria®

|                                     | Number of pts with event, rate per 1000 PY and 95% CI |                      |                  |                      | Adjusted Hazard Ratio (95% CI) <sup>a</sup> |
|-------------------------------------|-------------------------------------------------------|----------------------|------------------|----------------------|---------------------------------------------|
|                                     | No PIM <sup>^</sup>                                   |                      | PIM <sup>^</sup> |                      |                                             |
| <b>Primary Endpoint<sup>b</sup></b> |                                                       |                      |                  |                      |                                             |
| Androgens and estrogens             | 1776                                                  | 21.6 (20.6, 22.6)    | 59               | 15.2 (11.8, 19.7)    | 1.01 (0.77, 1.32)                           |
| Anticholinergics                    | 1730                                                  | 21.0 (20.1, 22.0)    | 105              | 27.5 (22.7, 33.3)    | 1.17 (0.97, 1.47)                           |
| Antipsychotics                      | 1795                                                  | 21.2 (20.2, 22.2)    | 40               | 32.3 (23.7, 44.0)    | 1.45 (1.06, 1.99)                           |
| Benzodiazepines                     | 1689                                                  | 20.9 (20.0, 21.9)    | 146              | 27.5 (23.4, 32.3)    | 1.11 (0.94, 1.32)                           |
| Cardiovascular                      | 1808                                                  | 21.2 (20.2, 22.2)    | 27               | 35.2 (24.2, 51.4)    | 1.35 (0.92, 1.98)                           |
| NSAID                               | 1697                                                  | 21.2 (20.2, 22.2)    | 138              | 23.5 (19.9, 27.8)    | 1.13 (0.95, 1.34)                           |
| Other pain medications              | 1819                                                  | 21.3 (20.3, 22.3)    | 16               | 32.6 (20.0, 53.2)    | 1.04 (0.63, 1.71)                           |
| PPI                                 | 1442                                                  | 21.2 (20.1, 22.3)    | 393              | 21.9 (19.9, 24.2)    | 0.96 (0.86, 1.07)                           |
| <b>Death</b>                        |                                                       |                      |                  |                      |                                             |
| Androgens and estrogens             | 1019                                                  | 12.1 (11.3, 12.8)    | 33               | 8.4 (6.0, 11.8)      | 1.11 (0.77, 1.58)                           |
| Anticholinergics                    | 1000                                                  | 11.8 (11.1, 12.6)    | 52               | 13.2 (10.0, 17.3)    | 1.04 (0.79, 1.38)                           |
| Antipsychotics                      | 1034                                                  | 11.9 (11.2, 12.6)    | 18               | 13.9 (8.8, 22.0)     | 1.18 (0.74, 1.90)                           |
| Benzodiazepines                     | 979                                                   | 11.8 (11.1, 12.6)    | 73               | 13.3 (11.6, 16.7)    | 1.01 (0.80, 1.29)                           |
| Cardiovascular                      | 1038                                                  | 11.9 (11.2, 12.6)    | 14               | 17.2 (10.2, 29.1)    | 1.13 (0.67, 1.92)                           |
| NSAID                               | 975                                                   | 11.8 (11.1, 12.6)    | 77               | 12.8 (10.2, 16.0)    | 1.07 (0.85, 1.35)                           |
| Other pain medications              | 1041                                                  | 11.8 (11.1, 12.6)    | 11               | 21.8 (12.1, 39.4)    | 1.22 (0.67, 2.21)                           |
| PPI                                 | 849                                                   | 12.1 (11.3, 13.0)    | 203              | 11.04 (9.6, 12.7)    | 0.85 (0.73, 0.99)                           |
| <b>Disability</b>                   |                                                       |                      |                  |                      |                                             |
| Androgens and estrogens             | 400                                                   | 5.5 (4.9, 6.0)       | 12               | 3.5 (2.0, 6.1)       | 0.88 (0.49, 1.57)                           |
| Anticholinergics                    | 381                                                   | 5.2 (4.7, 5.7)       | 31               | 9.4 (6.6, 13.4)      | 1.4 (0.96, 2.02)                            |
| Antipsychotics                      | 396                                                   | 5.2 (4.7, 5.8)       | 16               | 14.7 (9.0, 24.1)     | 1.96 (1.17, 3.28)                           |
| Benzodiazepines                     | 366                                                   | 5.1 (4.6, 5.6)       | 46               | 10.0 (7.5, 13.3)     | 1.38 (1.01, 1.89)                           |
| Cardiovascular                      | 406                                                   | 5.3 (4.8, 5.9)       | 6                | 8.7 (3.9, 19.3)      | 1.00 (0.44, 2.26)                           |
| NSAID                               | 379                                                   | 5.3 (4.8, 5.8)       | 33               | 6.4 (4.5, 9.0)       | 1.21 (0.85, 1.73)                           |
| Other pain medications              | 406                                                   | 5.3 (4.8, 5.9)       | 6                | 14.0 (6.3, 31.1)     | 1.27 (0.55, 2.94)                           |
| PPI                                 | 291                                                   | 4.8 (4.3, 5.4)       | 121              | 7.6 (6.4, 9.1)       | 1.34 (1.07, 1.67)                           |
| <b>Dementia</b>                     |                                                       |                      |                  |                      |                                             |
| Androgens and estrogens             | 557                                                   | 6.9 (6.4, 7.5)       | 18               | 4.7 (3.0, 7.5)       | 0.93 (0.57, 1.49)                           |
| Anticholinergics                    | 544                                                   | 6.8 (6.2, 7.4)       | 31               | 8.3 (5.8, 11.8)      | 1.11 (0.77, 1.60)                           |
| Antipsychotics                      | 563                                                   | 6.7 (6.2, 7.4)       | 12               | 9.7 (5.5, 17.1)      | 1.43 (0.81, 2.55)                           |
| Benzodiazepines                     | 533                                                   | 6.7 (6.2, 7.3)       | 42               | 8.1 (6.0, 10.9)      | 1.03 (0.75, 1.41)                           |
| Cardiovascular                      | 565                                                   | 6.8 (6.2, 7.3)       | 10               | 13.3 (7.1, 24.8)     | 1.77 (0.95, 3.32)                           |
| NSAID                               | 532                                                   | 6.8 (6.2, 7.4)       | 43               | 7.5 (5.6, 10.1)      | 1.11 (0.81, 1.51)                           |
| Other pain medications              | 575                                                   | 6.9 (6.3, 7.4)       | 0                | 0                    | -                                           |
| PPI                                 | 462                                                   | 6.9 (6.3, 7.6)       | 113              | 6.4 (5.3, 7.3)       | 0.89 (0.72, 1.10)                           |
| <b>Incident Hospitalization</b>     |                                                       |                      |                  |                      |                                             |
| Androgens and estrogens             | 7078                                                  | 106.2 (103.8, 108.7) | 363              | 120.6 (108.8, 133.7) | 1.22 (1.09, 1.36)                           |
| Anticholinergics                    | 7031                                                  | 105.2 (102.8, 107.7) | 410              | 144.8 (131.5, 160.0) | 1.3 (1.17, 1.44)                            |
| Antipsychotics                      | 7309                                                  | 106.4 (104.0, 108.9) | 132              | 139.8 (117.9, 165.8) | 1.18 (0.99, 1.40)                           |
| Benzodiazepines                     | 6935                                                  | 106.0 (103.6, 108.6) | 506              | 119.6 (109.7, 130.5) | 1.03 (0.93, 1.13)                           |
| Cardiovascular                      | 7367                                                  | 106.7 (104.3, 109.2) | 74               | 118.5 (94.4, 148.8)  | 1.07 (0.85, 1.35)                           |
| NSAID                               | 6828                                                  | 104.6 (102.1, 107.1) | 613              | 140.3 (129.6, 151.8) | 1.34 (1.23, 1.46)                           |
| Other pain medications              | 7391                                                  | 106.7 (104.3, 109.2) | 50               | 137.6 (104.3, 181.6) | 1.16 (0.87, 1.53)                           |
| PPI                                 | 5656                                                  | 101.5 (98.9, 104.2)  | 1785             | 128.1 (122.3, 134.2) | 1.18 (1.12, 1.25)                           |

<sup>^</sup> In this table PIM refers to the specific PIM indicated by the row e.g. No PIM vs PIM for the Androgen and estrogens row means no exposure vs exposure to Androgens and estrogens that fit the PIMs definition. Exposure to other PIMs is ignored;

<sup>a</sup> Adjusted for sex, age, country, years of education, frailty, average baseline gait speed, hypertension, diabetes, and the presence of depression; <sup>b</sup> Composite of death from any cause, incident dementia or incident disability; Gastrointestinal, Other hypnotics, Skeletal muscle relaxants, Sulfonylureas, Genitourinary, barbiturates, meprobamate and other endocrine (e.g. thyroid, growth hormone and megestrol) not presented to due lack of events.

*Table S6: Risk of cause of death from specific causes by baseline PPI use considered to be potentially inappropriate based on modified 2019 AGS Beers Criteria ®*

|                                       | No PPI use considered to be PIM |                                     | PPI considered to be PIM |                                     | Adjusted HR <sup>a</sup> (95% CI) |
|---------------------------------------|---------------------------------|-------------------------------------|--------------------------|-------------------------------------|-----------------------------------|
|                                       | N                               | Rate per 1000 person years (95% CI) | N                        | Rate per 1000 person years (95% CI) |                                   |
| Cancer Related                        | 411                             | 5.9 (5.3, 6.5)                      | 104                      | 5.7 (4.7, 6.8)                      | 0.89 (0.72, 1.11)                 |
| Cardiovascular Death                  | 56                              | 0.8 (0.6, 1.0)                      | 16                       | 0.9 (0.5, 1.4)                      | 1.00 (0.57, 1.76)                 |
| Clinically Significant Bleeding Death | 11                              | 0.2 (0.09, 0.3)                     | 7                        | 0.4 (0.2, 0.8)                      | 1.71 (0.63, 4.65)                 |
| Coronary Heart Disease Death          | 79                              | 1.1 (0.9, 1.4)                      | 17                       | 0.9 (0.6, 1.5)                      | 0.77 (0.46, 1.31)                 |
| Stroke Death                          | 59                              | 0.8 (0.7, 1.1)                      | 4                        | 0.2 (0.1, 0.6)                      | 0.23 (0.09, 0.70)                 |
| Other Death                           | 210                             | 3.0 (2.6, 3.4)                      | 53                       | 2.9 (2.2, 3.8)                      | 0.92 (0.70, 1.24)                 |
| Unadjudicated                         | 23                              | 0.33 (0.2, 0.5)                     | 2                        | 0.11(0.03, 0.4)                     | 0.54 (0.13, 2.34)                 |
| <b>Total</b>                          | <b>849</b>                      | <b>12.1 (11.3, 13.0)</b>            | <b>203</b>               | <b>11.0 (9.6, 12.7)</b>             | <b>0.85 (0.73, 0.995)</b>         |

<sup>a</sup> *Adjusted for sex, age, country, years of education, frailty, average baseline gait speed, hypertension, diabetes, and the presence of depression.*
